# Supplementary material for: Antimicrobial resistance and genomic characterization of Salmonella Dublin isolates in cattle from the United States
Source: PLoS One. 2021 Sep 21;16(9):e0249617. doi: 10.1371/journal.pone.0249617 (PMC8454963; doi:10.1371/journal.pone.0249617)
Supplement: S1 Table — (XLSX) [file pone.0249617.s001.xlsx]

## Sheet: Hoja1
	Supplemental Table. Isolates details
										Antimicrobial Susceptibility Testing
	sample ID	source species	organism	year of isolation	clinical rol	sample	geo loc	owner State	accession number	AMC		AMP		AZT		FOX		CRO		CHL		CIP		GEN		MER		NAL		STR		FIZ		TET		TRISUL
	18-006979-051	Cattle, Domestic	Salmonella enterica subsp. enterica serovar Dublin	2014	INFECTION	LUNG	USA	NY	SAMN19642044	= 8.0000	SUSC	= 8.0000	SUSC	<= 0.2500	SUSC	= 4.0000	SUSC	= 2.0000	INTER	> 32.0000	RESIST	<= 0.0150	SUSC	= 0.5000	SUSC	<= 0.0600	SUSC	= 2.0000	SUSC	> 64.0000	RESIST	> 256.0000	RESIST	= 32.0000	RESIST	= 1.0000	SUSC
	18-006979-068	Cattle, Domestic	Salmonella enterica subsp. enterica serovar Dublin	2014	INFECTION	INTEST	USA	MN	SAMN19641954	> 32.0000	RESIST	> 32.0000	RESIST	= 4.0000	SUSC	> 32.0000	RESIST	= 64.0000	RESIST	> 32.0000	RESIST	= 0.0300	SUSC	= 0.5000	SUSC	<= 0.0600	SUSC	= 4.0000	SUSC	> 64.0000	RESIST	> 256.0000	RESIST	> 32.0000	RESIST	> 4.0000	RESIST
	18-006979-127	Cattle, Domestic	Salmonella enterica subsp. enterica serovar Dublin	2014	UNKNOWN	LUNG	USA	MN	SAMN19641955	> 32.0000	RESIST	> 32.0000	RESIST	= 4.0000	SUSC	> 32.0000	RESIST	= 64.0000	RESIST	> 32.0000	RESIST	= 0.0300	SUSC	= 0.5000	SUSC	<= 0.0600	SUSC	= 4.0000	SUSC	> 64.0000	RESIST	> 256.0000	RESIST	> 32.0000	RESIST	= 0.2500	SUSC
	18-006979-146	Cattle, Domestic	Salmonella enterica subsp. enterica serovar Dublin	2014	INFECTION	UNKNOWN	USA	IA	SAMN19641994	> 32.0000	RESIST	> 32.0000	RESIST	= 8.0000	SUSC	> 32.0000	RESIST	= 16.0000	RESIST	> 32.0000	RESIST	= 0.5000	INTER	= 1.0000	SUSC	<= 0.0600	SUSC	> 32.0000	RESIST	> 64.0000	RESIST	> 256.0000	RESIST	> 32.0000	RESIST	= 0.2500	SUSC
	18-006979-158	Cattle, Domestic	Salmonella enterica subsp. enterica serovar Dublin	2014	INFECTION	LUNG	USA	IN	SAMN19642026	> 32.0000	RESIST	> 32.0000	RESIST	= 4.0000	SUSC	> 32.0000	RESIST	= 32.0000	RESIST	> 32.0000	RESIST	<= 0.0150	SUSC	= 2.0000	SUSC	<= 0.0600	SUSC	= 2.0000	SUSC	> 64.0000	RESIST	> 256.0000	RESIST	> 32.0000	RESIST	= 2.0000	SUSC
	18-006979-169	Cattle, Domestic	Salmonella enterica subsp. enterica serovar Dublin	2014	UNKNOWN	FECES	USA	SD	SAMN19641936	> 32.0000	RESIST	> 32.0000	RESIST	<= 0.2500	SUSC	> 32.0000	RESIST	> 64.0000	RESIST	= 4.0000	SUSC	<= 0.0150	SUSC	> 16.0000	RESIST	<= 0.0600	SUSC	<= 0.5000	SUSC	= 32.0000	SUSC	> 256.0000	RESIST	= 32.0000	RESIST	<= 0.1200	SUSC
	18-006979-205	Cattle, Domestic	Salmonella enterica subsp. enterica serovar Dublin	2014	UNKNOWN	LYMPH	USA	SD	SAMN19641937	= 32.0000	RESIST	> 32.0000	RESIST	= 4.0000	SUSC	> 32.0000	RESIST	= 16.0000	RESIST	> 32.0000	RESIST	= 0.0300	SUSC	<= 0.2500	SUSC	<= 0.0600	SUSC	= 4.0000	SUSC	> 64.0000	RESIST	> 256.0000	RESIST	> 32.0000	RESIST	<= 0.1200	SUSC
	18-006979-262	Cattle, Domestic	Salmonella enterica subsp. enterica serovar Dublin	2014	INFECTION	LIVER	USA	ID	SAMN19641933	<= 1.0000	SUSC	<= 1.0000	SUSC	= 4.0000	SUSC	= 8.0000	SUSC	<= 0.2500	SUSC	> 32.0000	RESIST	<= 0.0150	SUSC	= 0.5000	SUSC	<= 0.0600	SUSC	= 4.0000	SUSC	> 64.0000	RESIST	> 256.0000	RESIST	> 32.0000	RESIST	= 0.2500	SUSC
	18-006979-365	Cattle, Domestic	Salmonella enterica subsp. enterica serovar Dublin	2014	INFECTION	FECES	USA	NY	SAMN19642045	> 32.0000	RESIST	> 32.0000	RESIST	= 4.0000	SUSC	= 32.0000	RESIST	= 16.0000	RESIST	> 32.0000	RESIST	<= 0.0150	SUSC	= 1.0000	SUSC	<= 0.0600	SUSC	= 2.0000	SUSC	> 64.0000	RESIST	> 256.0000	RESIST	> 32.0000	RESIST	= 0.2500	SUSC
	18-006979-374	Cattle, Domestic	Salmonella enterica subsp. enterica serovar Dublin	2014	INFECTION	FECES	USA	OH	SAMN19642031	> 32.0000	RESIST	> 32.0000	RESIST	= 4.0000	SUSC	> 32.0000	RESIST	= 64.0000	RESIST	> 32.0000	RESIST	= 0.0300	SUSC	= 0.5000	SUSC	<= 0.0600	SUSC	= 4.0000	SUSC	> 64.0000	RESIST	> 256.0000	RESIST	> 32.0000	RESIST	= 0.2500	SUSC
	18-006979-377	Cattle, Domestic	Salmonella enterica subsp. enterica serovar Dublin	2014	UNKNOWN	LIVER	USA	PA	SAMN19642038	= 32.0000	RESIST	> 32.0000	RESIST	= 1.0000	SUSC	= 16.0000	INTER	= 16.0000	RESIST	> 32.0000	RESIST	= 0.0300	SUSC	= 0.5000	SUSC	<= 0.0600	SUSC	= 4.0000	SUSC	> 64.0000	RESIST	> 256.0000	RESIST	= 32.0000	RESIST	= 0.5000	SUSC
	18-006979-400	Cattle, Domestic	Salmonella enterica subsp. enterica serovar Dublin	2014	UNKNOWN	LIVER	USA	WA	SAMN19641928	> 32.0000	RESIST	> 32.0000	RESIST	= 0.5000	SUSC	> 32.0000	RESIST	= 64.0000	RESIST	> 32.0000	RESIST	<= 0.0150	SUSC	> 16.0000	RESIST	<= 0.0600	SUSC	<= 0.5000	SUSC	= 32.0000	SUSC	> 256.0000	RESIST	= 16.0000	RESIST	<= 0.1200	SUSC
	18-006979-422	Cattle, Domestic	Salmonella enterica subsp. enterica serovar Dublin	2014	INFECTION	LUNG	USA	OH	SAMN19642032	> 32.0000	RESIST	> 32.0000	RESIST	= 2.0000	SUSC	> 32.0000	RESIST	= 32.0000	RESIST	> 32.0000	RESIST	= 0.0600	SUSC	= 0.5000	SUSC	<= 0.0600	SUSC	= 8.0000	SUSC	> 64.0000	RESIST	> 256.0000	RESIST	> 32.0000	RESIST	= 0.5000	SUSC
	18-006979-438	Cattle, Domestic	Salmonella enterica subsp. enterica serovar Dublin	2014	INFECTION	LUNG	USA	SD	SAMN19641938	> 32.0000	RESIST	> 32.0000	RESIST	= 4.0000	SUSC	> 32.0000	RESIST	= 32.0000	RESIST	> 32.0000	RESIST	= 0.0300	SUSC	= 0.5000	SUSC	<= 0.0600	SUSC	= 4.0000	SUSC	> 64.0000	RESIST	> 256.0000	RESIST	> 32.0000	RESIST	= 0.2500	SUSC
	18-006979-453	Cattle, Domestic	Salmonella enterica subsp. enterica serovar Dublin	2014	INFECTION	LIVER	USA	MN	SAMN19641956	> 32.0000	RESIST	> 32.0000	RESIST	= 4.0000	SUSC	> 32.0000	RESIST	= 32.0000	RESIST	> 32.0000	RESIST	= 0.0300	SUSC	= 1.0000	SUSC	<= 0.0600	SUSC	= 4.0000	SUSC	> 64.0000	RESIST	> 256.0000	RESIST	> 32.0000	RESIST	= 0.2500	SUSC
	18-006979-464	Cattle, Domestic	Salmonella enterica subsp. enterica serovar Dublin	2014	INFECTION	LIVER	USA	MN	SAMN19641957	> 32.0000	RESIST	> 32.0000	RESIST	= 2.0000	SUSC	= 16.0000	INTER	= 16.0000	RESIST	> 32.0000	RESIST	<= 0.0150	SUSC	= 0.5000	SUSC	<= 0.0600	SUSC	= 2.0000	SUSC	> 64.0000	RESIST	> 256.0000	RESIST	> 32.0000	RESIST	<= 0.1200	SUSC
	18-006979-484	Cattle, Domestic	Salmonella enterica subsp. enterica serovar Dublin	2014	INFECTION	LUNG	USA	IL	SAMN19642020	= 32.0000	RESIST	> 32.0000	RESIST	= 4.0000	SUSC	= 16.0000	INTER	= 8.0000	RESIST	> 32.0000	RESIST	<= 0.0150	SUSC	= 0.5000	SUSC	<= 0.0600	SUSC	= 4.0000	SUSC	> 64.0000	RESIST	> 256.0000	RESIST	= 32.0000	RESIST	= 0.2500	SUSC
	18-006979-485	Cattle, Domestic	Salmonella enterica subsp. enterica serovar Dublin	2014	INFECTION	LIVER	USA	IN	SAMN19642027	> 32.0000	RESIST	> 32.0000	RESIST	= 4.0000	SUSC	> 32.0000	RESIST	= 32.0000	RESIST	> 32.0000	RESIST	= 0.2500	INTER	= 1.0000	SUSC	<= 0.0600	SUSC	> 32.0000	RESIST	> 64.0000	RESIST	> 256.0000	RESIST	> 32.0000	RESIST	= 0.2500	SUSC
	18-006979-490	Cattle, Domestic	Salmonella enterica subsp. enterica serovar Dublin	2014	INFECTION	LUNG	USA	IA	SAMN19641995	> 32.0000	RESIST	> 32.0000	RESIST	= 2.0000	SUSC	> 32.0000	RESIST	= 32.0000	RESIST	> 32.0000	RESIST	= 0.0300	SUSC	= 0.5000	SUSC	<= 0.0600	SUSC	= 2.0000	SUSC	> 64.0000	RESIST	> 256.0000	RESIST	> 32.0000	RESIST	= 0.5000	SUSC
	18-006979-497	Cattle, Domestic	Salmonella enterica subsp. enterica serovar Dublin	2014	INFECTION	SPLEEN	USA	MN	SAMN19641958	= 32.0000	RESIST	> 32.0000	RESIST	= 4.0000	SUSC	= 16.0000	INTER	= 16.0000	RESIST	> 32.0000	RESIST	= 0.0300	SUSC	= 0.5000	SUSC	<= 0.0600	SUSC	= 4.0000	SUSC	> 64.0000	RESIST	> 256.0000	RESIST	= 32.0000	RESIST	= 0.5000	SUSC
	18-006979-500	Cattle, Domestic	Salmonella enterica subsp. enterica serovar Dublin	2014	INFECTION	LIVER	USA	PA	SAMN19642039	> 32.0000	RESIST	> 32.0000	RESIST	= 4.0000	SUSC	> 32.0000	RESIST	= 32.0000	RESIST	> 32.0000	RESIST	= 0.0300	SUSC	= 1.0000	SUSC	<= 0.0600	SUSC	= 4.0000	SUSC	> 64.0000	RESIST	> 256.0000	RESIST	> 32.0000	RESIST	= 0.2500	SUSC
	18-006979-501	Cattle, Domestic	Salmonella enterica subsp. enterica serovar Dublin	2014	INFECTION	LUNG	USA	PA	SAMN19642040	> 32.0000	RESIST	> 32.0000	RESIST	= 4.0000	SUSC	> 32.0000	RESIST	= 32.0000	RESIST	> 32.0000	RESIST	= 0.0300	SUSC	= 1.0000	SUSC	<= 0.0600	SUSC	= 4.0000	SUSC	> 64.0000	RESIST	> 256.0000	RESIST	> 32.0000	RESIST	= 0.2500	SUSC
	18-006979-506	Cattle, Domestic	Salmonella enterica subsp. enterica serovar Dublin	2014	UNKNOWN	INTEST	USA	MN	SAMN19641959	> 32.0000	RESIST	> 32.0000	RESIST	= 4.0000	SUSC	> 32.0000	RESIST	= 32.0000	RESIST	> 32.0000	RESIST	= 0.0300	SUSC	= 1.0000	SUSC	<= 0.0600	SUSC	= 4.0000	SUSC	> 64.0000	RESIST	> 256.0000	RESIST	> 32.0000	RESIST	= 4.0000	RESIST
	18-006979-536	Cattle, Domestic	Salmonella enterica subsp. enterica serovar Dublin	2014	INFECTION	LUNG	USA	IA	SAMN19641996	> 32.0000	RESIST	> 32.0000	RESIST	= 4.0000	SUSC	> 32.0000	RESIST	= 16.0000	RESIST	> 32.0000	RESIST	= 0.0300	SUSC	= 2.0000	SUSC	<= 0.0600	SUSC	= 4.0000	SUSC	> 64.0000	RESIST	> 256.0000	RESIST	> 32.0000	RESIST	> 4.0000	RESIST
	18-012180-028	Cattle, Domestic	Salmonella enterica subsp. enterica serovar Dublin	2015	UNKNOWN	INTEST	USA	NE	SAMN19641935	> 32.0000	RESIST	> 32.0000	RESIST	= 4.0000	SUSC	> 32.0000	RESIST	= 32.0000	RESIST	> 32.0000	RESIST	= 0.0300	SUSC	= 0.5000	SUSC	<= 0.0600	SUSC	= 4.0000	SUSC	> 64.0000	RESIST	> 256.0000	RESIST	> 32.0000	RESIST	= 0.2500	SUSC
	18-012180-063	Cattle, Domestic	Salmonella enterica subsp. enterica serovar Dublin	2015	UNKNOWN	UNKNOWN	USA	IL	SAMN19642021	> 32.0000	RESIST	> 32.0000	RESIST	= 8.0000	SUSC	> 32.0000	RESIST	= 32.0000	RESIST	= 8.0000	SUSC	<= 0.0150	SUSC	= 1.0000	SUSC	<= 0.0600	SUSC	= 4.0000	SUSC	> 64.0000	RESIST	= 32.0000	SUSC	> 32.0000	RESIST	<= 0.1200	SUSC
	18-012180-088	Cattle, Domestic	Salmonella enterica subsp. enterica serovar Dublin	2015	INFECTION	LIVER	USA	IA	SAMN19641997	<= 1.0000	SUSC	<= 1.0000	SUSC	= 4.0000	SUSC	= 2.0000	SUSC	<= 0.2500	SUSC	= 4.0000	SUSC	<= 0.0150	SUSC	= 1.0000	SUSC	<= 0.0600	SUSC	= 2.0000	SUSC	= 8.0000	SUSC	= 32.0000	SUSC	<= 4.0000	SUSC	<= 0.1200	SUSC
	18-012180-104	Cattle, Domestic	Salmonella enterica subsp. enterica serovar Dublin	2015	INFECTION	LUNG	USA	MN	SAMN19641960	<= 1.0000	SUSC	<= 1.0000	SUSC	= 4.0000	SUSC	= 2.0000	SUSC	<= 0.2500	SUSC	= 8.0000	SUSC	<= 0.0150	SUSC	= 0.5000	SUSC	<= 0.0600	SUSC	= 2.0000	SUSC	= 4.0000	SUSC	= 64.0000	SUSC	<= 4.0000	SUSC	<= 0.1200	SUSC
	18-012180-146	Cattle, Domestic	Salmonella enterica subsp. enterica serovar Dublin	2015	UNKNOWN	LUNG	USA	MN	SAMN19641961	> 32.0000	RESIST	> 32.0000	RESIST	= 4.0000	SUSC	= 32.0000	RESIST	= 8.0000	RESIST	> 32.0000	RESIST	= 0.2500	INTER	= 1.0000	SUSC	<= 0.0600	SUSC	> 32.0000	RESIST	> 64.0000	RESIST	> 256.0000	RESIST	> 32.0000	RESIST	= 0.5000	SUSC
	18-012180-152	Cattle, Domestic	Salmonella enterica subsp. enterica serovar Dublin	2015	INFECTION	LUNG	USA	MO	SAMN19642015	<= 1.0000	SUSC	<= 1.0000	SUSC	= 0.5000	SUSC	= 2.0000	SUSC	<= 0.2500	SUSC	> 32.0000	RESIST	<= 0.0150	SUSC	<= 0.2500	SUSC	<= 0.0600	SUSC	<= 0.5000	SUSC	> 64.0000	RESIST	> 256.0000	RESIST	= 16.0000	RESIST	= 0.2500	SUSC
	18-012180-164	Cattle, Domestic	Salmonella enterica subsp. enterica serovar Dublin	2015	INFECTION	LIVER	USA	IA	SAMN19641998	> 32.0000	RESIST	= 32.0000	RESIST	= 2.0000	SUSC	= 16.0000	INTER	= 8.0000	RESIST	> 32.0000	RESIST	<= 0.0150	SUSC	= 1.0000	SUSC	<= 0.0600	SUSC	= 8.0000	SUSC	> 64.0000	RESIST	> 256.0000	RESIST	> 32.0000	RESIST	= 0.2500	SUSC
	18-012180-197	Cattle, Domestic	Salmonella enterica subsp. enterica serovar Dublin	2015	INFECTION	BLOOD	USA	NY	SAMN19642046	> 32.0000	RESIST	> 32.0000	RESIST	= 4.0000	SUSC	> 32.0000	RESIST	= 32.0000	RESIST	> 32.0000	RESIST	= 0.0300	SUSC	= 1.0000	SUSC	<= 0.0600	SUSC	= 4.0000	SUSC	> 64.0000	RESIST	> 256.0000	RESIST	> 32.0000	RESIST	= 0.5000	SUSC
	18-012180-239	Cattle, Domestic	Salmonella enterica subsp. enterica serovar Dublin	2015	UNKNOWN	INTCNTS	USA	IL	SAMN19642022	> 32.0000	RESIST	> 32.0000	RESIST	= 4.0000	SUSC	= 16.0000	INTER	= 16.0000	RESIST	> 32.0000	RESIST	= 0.0300	SUSC	= 1.0000	SUSC	<= 0.0600	SUSC	= 8.0000	SUSC	> 64.0000	RESIST	> 256.0000	RESIST	> 32.0000	RESIST	= 0.5000	SUSC
	18-012180-240	Cattle, Domestic	Salmonella enterica subsp. enterica serovar Dublin	2015	INFECTION	LUNG	USA	IA	SAMN19641999	> 32.0000	RESIST	> 32.0000	RESIST	= 4.0000	SUSC	> 32.0000	RESIST	= 32.0000	RESIST	> 32.0000	RESIST	= 0.0300	SUSC	= 1.0000	SUSC	<= 0.0600	SUSC	= 4.0000	SUSC	> 64.0000	RESIST	> 256.0000	RESIST	> 32.0000	RESIST	= 0.2500	SUSC
	18-012180-241	Cattle, Domestic	Salmonella enterica subsp. enterica serovar Dublin	2015	INFECTION	LYMPH	USA	IA	SAMN19642000	> 32.0000	RESIST	> 32.0000	RESIST	= 2.0000	SUSC	= 32.0000	RESIST	= 16.0000	RESIST	> 32.0000	RESIST	<= 0.0150	SUSC	<= 0.2500	SUSC	<= 0.0600	SUSC	= 4.0000	SUSC	> 64.0000	RESIST	> 256.0000	RESIST	> 32.0000	RESIST	= 0.5000	SUSC
	18-012180-249	Cattle, Domestic	Salmonella enterica subsp. enterica serovar Dublin	2015	INFECTION	LIVER	USA	MN	SAMN19641962	> 32.0000	RESIST	> 32.0000	RESIST	= 0.5000	SUSC	= 32.0000	RESIST	= 32.0000	RESIST	> 32.0000	RESIST	= 0.0600	SUSC	<= 0.2500	SUSC	<= 0.0600	SUSC	> 32.0000	RESIST	> 64.0000	RESIST	> 256.0000	RESIST	= 16.0000	RESIST	<= 0.1200	SUSC
	18-012180-263	Cattle, Domestic	Salmonella enterica subsp. enterica serovar Dublin	2015	INFECTION	LUNG	USA	IA	SAMN19642001	> 32.0000	RESIST	> 32.0000	RESIST	= 4.0000	SUSC	> 32.0000	RESIST	= 32.0000	RESIST	> 32.0000	RESIST	= 0.0300	SUSC	= 0.5000	SUSC	<= 0.0600	SUSC	= 4.0000	SUSC	> 64.0000	RESIST	> 256.0000	RESIST	> 32.0000	RESIST	> 4.0000	RESIST
	18-012180-280	Cattle, Domestic	Salmonella enterica subsp. enterica serovar Dublin	2015	INFECTION	INTEST	USA	SD	SAMN19641939	> 32.0000	RESIST	> 32.0000	RESIST	= 4.0000	SUSC	> 32.0000	RESIST	= 32.0000	RESIST	> 32.0000	RESIST	= 0.0600	SUSC	= 0.5000	SUSC	= 0.1200	SUSC	= 4.0000	SUSC	> 64.0000	RESIST	> 256.0000	RESIST	> 32.0000	RESIST	= 0.5000	SUSC
	18-012180-294	Cattle, Domestic	Salmonella enterica subsp. enterica serovar Dublin	2015	INFECTION	LUNG	USA	MO	SAMN19642016	> 32.0000	RESIST	> 32.0000	RESIST	= 8.0000	SUSC	> 32.0000	RESIST	= 32.0000	RESIST	> 32.0000	RESIST	= 1.0000	RESIST	= 1.0000	SUSC	<= 0.0600	SUSC	> 32.0000	RESIST	> 64.0000	RESIST	> 256.0000	RESIST	> 32.0000	RESIST	= 1.0000	SUSC
	18-012180-296	Cattle, Domestic	Salmonella enterica subsp. enterica serovar Dublin	2015	INFECTION	LIVER	USA	MO	SAMN19642017	> 32.0000	RESIST	> 32.0000	RESIST	= 4.0000	SUSC	> 32.0000	RESIST	= 32.0000	RESIST	> 32.0000	RESIST	= 0.2500	INTER	= 1.0000	SUSC	<= 0.0600	SUSC	> 32.0000	RESIST	> 64.0000	RESIST	> 256.0000	RESIST	> 32.0000	RESIST	= 0.2500	SUSC
	18-012180-298	Cattle, Domestic	Salmonella enterica subsp. enterica serovar Dublin	2015	INFECTION	JOINFL	USA	NY	SAMN19642047	> 32.0000	RESIST	> 32.0000	RESIST	= 8.0000	SUSC	> 32.0000	RESIST	= 16.0000	RESIST	> 32.0000	RESIST	<= 0.0150	SUSC	= 0.5000	SUSC	<= 0.0600	SUSC	= 4.0000	SUSC	> 64.0000	RESIST	> 256.0000	RESIST	> 32.0000	RESIST	= 0.2500	SUSC
	18-012180-314	Cattle, Domestic	Salmonella enterica subsp. enterica serovar Dublin	2015	INFECTION	LIVER	USA	MN	SAMN19641963	> 32.0000	RESIST	> 32.0000	RESIST	= 4.0000	SUSC	> 32.0000	RESIST	= 32.0000	RESIST	> 32.0000	RESIST	= 0.0300	SUSC	= 1.0000	SUSC	<= 0.0600	SUSC	= 4.0000	SUSC	> 64.0000	RESIST	> 256.0000	RESIST	> 32.0000	RESIST	= 0.5000	SUSC
	18-012180-328	Cattle, Domestic	Salmonella enterica subsp. enterica serovar Dublin	2015	INFECTION	FSWAB	USA	TX	SAMN19641948	= 32.0000	RESIST	> 32.0000	RESIST	= 4.0000	SUSC	= 32.0000	RESIST	= 8.0000	RESIST	> 32.0000	RESIST	= 0.1200	INTER	= 1.0000	SUSC	<= 0.0600	SUSC	> 32.0000	RESIST	> 64.0000	RESIST	> 256.0000	RESIST	= 32.0000	RESIST	= 0.5000	SUSC
	18-012180-337	Cattle, Domestic	Salmonella enterica subsp. enterica serovar Dublin	2015	INFECTION	LUNG	USA	MN	SAMN19641964	> 32.0000	RESIST	> 32.0000	RESIST	= 4.0000	SUSC	> 32.0000	RESIST	= 32.0000	RESIST	> 32.0000	RESIST	= 0.0300	SUSC	= 1.0000	SUSC	<= 0.0600	SUSC	= 4.0000	SUSC	> 64.0000	RESIST	> 256.0000	RESIST	> 32.0000	RESIST	= 0.5000	SUSC
	18-012180-360	Cattle, Domestic	Salmonella enterica subsp. enterica serovar Dublin	2015	UNKNOWN	KIDNEY	USA	SD	SAMN19641940	> 32.0000	RESIST	> 32.0000	RESIST	= 4.0000	SUSC	> 32.0000	RESIST	= 64.0000	RESIST	> 32.0000	RESIST	= 0.5000	INTER	= 1.0000	SUSC	<= 0.0600	SUSC	> 32.0000	RESIST	> 64.0000	RESIST	> 256.0000	RESIST	> 32.0000	RESIST	= 0.2500	SUSC
	18-012180-365	Cattle, Domestic	Salmonella enterica subsp. enterica serovar Dublin	2015	INFECTION	LIVER	USA	NY	SAMN19642048	> 32.0000	RESIST	> 32.0000	RESIST	= 1.0000	SUSC	> 32.0000	RESIST	= 32.0000	RESIST	> 32.0000	RESIST	= 0.0300	SUSC	= 1.0000	SUSC	<= 0.0600	SUSC	= 8.0000	SUSC	> 64.0000	RESIST	> 256.0000	RESIST	> 32.0000	RESIST	= 1.0000	SUSC
	18-012180-369	Cattle, Domestic	Salmonella enterica subsp. enterica serovar Dublin	2015	INFECTION	LIVER	USA	MN	SAMN19641965	= 2.0000	SUSC	= 2.0000	SUSC	= 4.0000	SUSC	= 8.0000	SUSC	<= 0.2500	SUSC	> 32.0000	RESIST	= 0.0300	SUSC	= 0.5000	SUSC	<= 0.0600	SUSC	= 8.0000	SUSC	> 64.0000	RESIST	> 256.0000	RESIST	> 32.0000	RESIST	<= 0.1200	SUSC
	18-012180-390	Cattle, Domestic	Salmonella enterica subsp. enterica serovar Dublin	2015	INFECTION	LUNG	USA	IA	SAMN19642002	> 32.0000	RESIST	> 32.0000	RESIST	= 8.0000	SUSC	> 32.0000	RESIST	= 32.0000	RESIST	> 32.0000	RESIST	= 0.5000	INTER	= 1.0000	SUSC	<= 0.0600	SUSC	> 32.0000	RESIST	> 64.0000	RESIST	> 256.0000	RESIST	> 32.0000	RESIST	= 0.2500	SUSC
	18-012180-391	Cattle, Domestic	Salmonella enterica subsp. enterica serovar Dublin	2015	INFECTION	LUNG	USA	IA	SAMN19642003	= 2.0000	SUSC	= 2.0000	SUSC	= 4.0000	SUSC	= 8.0000	SUSC	<= 0.2500	SUSC	> 32.0000	RESIST	= 0.0300	SUSC	= 1.0000	SUSC	<= 0.0600	SUSC	= 4.0000	SUSC	> 64.0000	RESIST	> 256.0000	RESIST	> 32.0000	RESIST	> 4.0000	RESIST
	18-012180-394	Cattle, Domestic	Salmonella enterica subsp. enterica serovar Dublin	2015	INFECTION	LUNG	USA	MO	SAMN19642018	> 32.0000	RESIST	> 32.0000	RESIST	= 4.0000	SUSC	> 32.0000	RESIST	= 32.0000	RESIST	> 32.0000	RESIST	= 0.0300	SUSC	= 1.0000	SUSC	<= 0.0600	SUSC	= 4.0000	SUSC	> 64.0000	RESIST	> 256.0000	RESIST	> 32.0000	RESIST	= 0.2500	SUSC
	18-012180-405	Cattle, Domestic	Salmonella enterica subsp. enterica serovar Dublin	2015	INFECTION	LIVER	USA	MN	SAMN19641966	> 32.0000	RESIST	> 32.0000	RESIST	= 4.0000	SUSC	> 32.0000	RESIST	= 16.0000	RESIST	> 32.0000	RESIST	= 0.0300	SUSC	= 2.0000	SUSC	<= 0.0600	SUSC	= 4.0000	SUSC	> 64.0000	RESIST	> 256.0000	RESIST	> 32.0000	RESIST	> 4.0000	RESIST
	18-012180-412	Cattle, Domestic	Salmonella enterica subsp. enterica serovar Dublin	2015	INFECTION	LUNG	USA	IA	SAMN19642004	> 32.0000	RESIST	> 32.0000	RESIST	= 4.0000	SUSC	> 32.0000	RESIST	= 32.0000	RESIST	> 32.0000	RESIST	= 0.5000	INTER	= 0.5000	SUSC	<= 0.0600	SUSC	> 32.0000	RESIST	> 64.0000	RESIST	> 256.0000	RESIST	> 32.0000	RESIST	= 0.5000	SUSC
	18-012180-413	Cattle, Domestic	Salmonella enterica subsp. enterica serovar Dublin	2015	INFECTION	INTCNTS	USA	NY	SAMN19642049	> 32.0000	RESIST	> 32.0000	RESIST	= 4.0000	SUSC	> 32.0000	RESIST	= 32.0000	RESIST	> 32.0000	RESIST	= 0.0300	SUSC	= 0.5000	SUSC	<= 0.0600	SUSC	= 4.0000	SUSC	> 64.0000	RESIST	> 256.0000	RESIST	> 32.0000	RESIST	= 0.5000	SUSC
	18-012180-416	Cattle, Domestic	Salmonella enterica subsp. enterica serovar Dublin	2015	INFECTION	LIVER	USA	MN	SAMN19641967	> 32.0000	RESIST	> 32.0000	RESIST	= 4.0000	SUSC	= 32.0000	RESIST	= 16.0000	RESIST	> 32.0000	RESIST	= 0.0300	SUSC	= 0.5000	SUSC	<= 0.0600	SUSC	= 4.0000	SUSC	> 64.0000	RESIST	> 256.0000	RESIST	> 32.0000	RESIST	= 2.0000	SUSC
	18-012180-435	Cattle, Domestic	Salmonella enterica subsp. enterica serovar Dublin	2015	INFECTION	LUNG	USA	IA	SAMN19642005	> 32.0000	RESIST	> 32.0000	RESIST	= 8.0000	SUSC	> 32.0000	RESIST	= 16.0000	RESIST	= 8.0000	SUSC	= 0.0300	SUSC	= 1.0000	SUSC	<= 0.0600	SUSC	= 8.0000	SUSC	> 64.0000	RESIST	> 256.0000	RESIST	> 32.0000	RESIST	= 0.2500	SUSC
	18-012180-447	Cattle, Domestic	Salmonella enterica subsp. enterica serovar Dublin	2015	UNKNOWN	LYMPH	USA	SD	SAMN19641941	> 32.0000	RESIST	> 32.0000	RESIST	= 4.0000	SUSC	= 16.0000	INTER	= 4.0000	RESIST	> 32.0000	RESIST	<= 0.0150	SUSC	<= 0.2500	SUSC	<= 0.0600	SUSC	= 4.0000	SUSC	> 64.0000	RESIST	> 256.0000	RESIST	> 32.0000	RESIST	= 0.2500	SUSC
	18-012180-460	Cattle, Domestic	Salmonella enterica subsp. enterica serovar Dublin	2015	INFECTION	LUNG	USA	OH	SAMN19642033	<= 1.0000	SUSC	<= 1.0000	SUSC	= 0.5000	SUSC	= 2.0000	SUSC	<= 0.2500	SUSC	> 32.0000	RESIST	<= 0.0150	SUSC	<= 0.2500	SUSC	<= 0.0600	SUSC	<= 0.5000	SUSC	> 64.0000	RESIST	> 256.0000	RESIST	= 16.0000	RESIST	= 1.0000	SUSC
	18-012180-462	Cattle, Domestic	Salmonella enterica subsp. enterica serovar Dublin	2015	INFECTION	CULTURE	USA	NY	SAMN19642050	> 32.0000	RESIST	> 32.0000	RESIST	= 4.0000	SUSC	> 32.0000	RESIST	= 32.0000	RESIST	> 32.0000	RESIST	= 0.0300	SUSC	= 1.0000	SUSC	<= 0.0600	SUSC	= 8.0000	SUSC	> 64.0000	RESIST	> 256.0000	RESIST	> 32.0000	RESIST	= 0.2500	SUSC
	18-012180-463	Cattle, Domestic	Salmonella enterica subsp. enterica serovar Dublin	2015	INFECTION	CULTURE	USA	NY	SAMN19642051	> 32.0000	RESIST	> 32.0000	RESIST	= 2.0000	SUSC	= 32.0000	RESIST	= 8.0000	RESIST	> 32.0000	RESIST	<= 0.0150	SUSC	= 0.5000	SUSC	<= 0.0600	SUSC	= 2.0000	SUSC	> 64.0000	RESIST	> 256.0000	RESIST	= 16.0000	RESIST	= 0.5000	SUSC
	18-012180-467	Cattle, Domestic	Salmonella enterica subsp. enterica serovar Dublin	2015	INFECTION	FECES	USA	WA	SAMN19641929	> 32.0000	RESIST	> 32.0000	RESIST	= 4.0000	SUSC	> 32.0000	RESIST	= 64.0000	RESIST	> 32.0000	RESIST	= 0.0300	SUSC	= 16.0000	RESIST	<= 0.0600	SUSC	= 8.0000	SUSC	= 16.0000	SUSC	> 256.0000	RESIST	> 32.0000	RESIST	= 0.2500	SUSC
	18-012180-510	Cattle, Domestic	Salmonella enterica subsp. enterica serovar Dublin	2015	INFECTION	FECES	USA	TX	SAMN19641949	> 32.0000	RESIST	> 32.0000	RESIST	= 4.0000	SUSC	= 16.0000	INTER	= 4.0000	RESIST	> 32.0000	RESIST	<= 0.0150	SUSC	= 1.0000	SUSC	<= 0.0600	SUSC	= 4.0000	SUSC	> 64.0000	RESIST	> 256.0000	RESIST	> 32.0000	RESIST	= 0.2500	SUSC
	18-012180-513	Cattle, Domestic	Salmonella enterica subsp. enterica serovar Dublin	2015	INFECTION	LUNG	USA	PA	SAMN19642041	> 32.0000	RESIST	> 32.0000	RESIST	= 4.0000	SUSC	> 32.0000	RESIST	> 64.0000	RESIST	> 32.0000	RESIST	= 0.0300	SUSC	= 2.0000	SUSC	<= 0.0600	SUSC	= 8.0000	SUSC	> 64.0000	RESIST	> 256.0000	RESIST	> 32.0000	RESIST	= 0.5000	SUSC
	18-012180-520	Cattle, Domestic	Salmonella enterica subsp. enterica serovar Dublin	2015	INFECTION	LIVER	USA	MN	SAMN19641968	> 32.0000	RESIST	> 32.0000	RESIST	= 4.0000	SUSC	> 32.0000	RESIST	= 32.0000	RESIST	= 8.0000	SUSC	= 0.0300	SUSC	= 1.0000	SUSC	<= 0.0600	SUSC	= 4.0000	SUSC	= 32.0000	RESIST	> 256.0000	RESIST	> 32.0000	RESIST	= 0.5000	SUSC
	18-012180-523	Cattle, Domestic	Salmonella enterica subsp. enterica serovar Dublin	2015	UNKNOWN	LUNG	USA	OK	SAMN19641947	<= 1.0000	SUSC	= 2.0000	SUSC	= 4.0000	SUSC	= 8.0000	SUSC	<= 0.2500	SUSC	= 8.0000	SUSC	= 0.0300	SUSC	= 1.0000	SUSC	<= 0.0600	SUSC	= 8.0000	SUSC	= 16.0000	SUSC	<= 16.0000	SUSC	<= 4.0000	SUSC	<= 0.1200	SUSC
	18-012180-526	Cattle, Domestic	Salmonella enterica subsp. enterica serovar Dublin	2015	INFECTION	KIDNEY	USA	NY	SAMN19642052	> 32.0000	RESIST	> 32.0000	RESIST	= 4.0000	SUSC	> 32.0000	RESIST	= 64.0000	RESIST	> 32.0000	RESIST	= 0.0300	SUSC	= 1.0000	SUSC	<= 0.0600	SUSC	= 4.0000	SUSC	> 64.0000	RESIST	> 256.0000	RESIST	> 32.0000	RESIST	= 0.2500	SUSC
	18-012180-527	Cattle, Domestic	Salmonella enterica subsp. enterica serovar Dublin	2015	INFECTION	LIVER	USA	NY	SAMN19642053	> 32.0000	RESIST	> 32.0000	RESIST	= 4.0000	SUSC	> 32.0000	RESIST	= 32.0000	RESIST	> 32.0000	RESIST	= 0.0300	SUSC	= 1.0000	SUSC	<= 0.0600	SUSC	= 4.0000	SUSC	> 64.0000	RESIST	> 256.0000	RESIST	> 32.0000	RESIST	= 0.2500	SUSC
	18-012180-528	Cattle, Domestic	Salmonella enterica subsp. enterica serovar Dublin	2015	INFECTION	CULTURE	USA	MN	SAMN19641969	> 32.0000	RESIST	> 32.0000	RESIST	= 4.0000	SUSC	> 32.0000	RESIST	= 32.0000	RESIST	> 32.0000	RESIST	= 0.0300	SUSC	= 1.0000	SUSC	<= 0.0600	SUSC	= 8.0000	SUSC	> 64.0000	RESIST	> 256.0000	RESIST	> 32.0000	RESIST	= 2.0000	SUSC
	18-012180-541	Cattle, Domestic	Salmonella enterica subsp. enterica serovar Dublin	2015	INFECTION	CULTURE	USA	IA	SAMN19642006	> 32.0000	RESIST	> 32.0000	RESIST	= 8.0000	SUSC	> 32.0000	RESIST	= 32.0000	RESIST	> 32.0000	RESIST	= 0.2500	INTER	= 2.0000	SUSC	<= 0.0600	SUSC	> 32.0000	RESIST	> 64.0000	RESIST	> 256.0000	RESIST	> 32.0000	RESIST	= 0.2500	SUSC
	18-012180-544	Cattle, Domestic	Salmonella enterica subsp. enterica serovar Dublin	2015	INFECTION	CULTURE	USA	IN	SAMN19642028	> 32.0000	RESIST	> 32.0000	RESIST	= 8.0000	SUSC	> 32.0000	RESIST	= 64.0000	RESIST	> 32.0000	RESIST	= 0.0300	SUSC	= 1.0000	SUSC	<= 0.0600	SUSC	= 4.0000	SUSC	> 64.0000	RESIST	> 256.0000	RESIST	> 32.0000	RESIST	> 4.0000	RESIST
	18-012180-549	Cattle, Domestic	Salmonella enterica subsp. enterica serovar Dublin	2015	UNKNOWN	LUNG	USA	SD	SAMN19641942	> 32.0000	RESIST	> 32.0000	RESIST	= 4.0000	SUSC	> 32.0000	RESIST	= 32.0000	RESIST	> 32.0000	RESIST	= 0.5000	INTER	= 1.0000	SUSC	<= 0.0600	SUSC	> 32.0000	RESIST	> 64.0000	RESIST	> 256.0000	RESIST	> 32.0000	RESIST	= 0.2500	SUSC
	18-012180-555	Cattle, Domestic	Salmonella enterica subsp. enterica serovar Dublin	2015	INFECTION	LIVER	USA	MN	SAMN19641970	> 32.0000	RESIST	> 32.0000	RESIST	= 4.0000	SUSC	> 32.0000	RESIST	= 32.0000	RESIST	> 32.0000	RESIST	= 0.0300	SUSC	= 1.0000	SUSC	<= 0.0600	SUSC	= 4.0000	SUSC	> 64.0000	RESIST	> 256.0000	RESIST	> 32.0000	RESIST	= 0.2500	SUSC
	18-012180-603	Cattle, Domestic	Salmonella enterica subsp. enterica serovar Dublin	2015	UNKNOWN	CULTURE	USA	KY	SAMN19642062	<= 1.0000	SUSC	<= 1.0000	SUSC	= 8.0000	SUSC	= 2.0000	SUSC	<= 0.2500	SUSC	> 32.0000	RESIST	<= 0.0150	SUSC	= 1.0000	SUSC	<= 0.0600	SUSC	= 4.0000	SUSC	> 64.0000	RESIST	> 256.0000	RESIST	> 32.0000	RESIST	= 0.5000	SUSC
	18-024125-024	Cattle, Domestic	Salmonella enterica subsp. enterica serovar Dublin	2016	UNKNOWN	LUNG	USA	KY	SAMN19642063	> 32.0000	RESIST	> 32.0000	RESIST	= 4.0000	SUSC	> 32.0000	RESIST	= 16.0000	RESIST	> 32.0000	RESIST	= 0.0300	SUSC	= 2.0000	SUSC	<= 0.0600	SUSC	= 8.0000	SUSC	> 64.0000	RESIST	> 256.0000	RESIST	> 32.0000	RESIST	= 0.2500	SUSC
	18-024125-031	Cattle, Domestic	Salmonella enterica subsp. enterica serovar Dublin	2016	INFECTION	FECES	USA	IA	SAMN19642007	> 32.0000	RESIST	> 32.0000	RESIST	= 4.0000	SUSC	> 32.0000	RESIST	= 32.0000	RESIST	= 8.0000	SUSC	= 0.0300	SUSC	= 1.0000	SUSC	<= 0.0600	SUSC	= 4.0000	SUSC	> 64.0000	RESIST	> 256.0000	RESIST	> 32.0000	RESIST	= 0.2500	SUSC
	18-024125-033	Cattle, Domestic	Salmonella enterica subsp. enterica serovar Dublin	2016	INFECTION	LUNG	USA	MN	SAMN19641971	= 2.0000	SUSC	<= 1.0000	SUSC	= 8.0000	SUSC	= 4.0000	SUSC	<= 0.2500	SUSC	> 32.0000	RESIST	= 0.0300	SUSC	= 0.5000	SUSC	<= 0.0600	SUSC	= 4.0000	SUSC	> 64.0000	RESIST	> 256.0000	RESIST	> 32.0000	RESIST	= 0.5000	SUSC
	18-024125-038	Cattle, Domestic	Salmonella enterica subsp. enterica serovar Dublin	2016	INFECTION	LUNG	USA	IL	SAMN19642023	> 32.0000	RESIST	> 32.0000	RESIST	= 8.0000	SUSC	> 32.0000	RESIST	= 16.0000	RESIST	> 32.0000	RESIST	= 0.0300	SUSC	= 1.0000	SUSC	<= 0.0600	SUSC	= 4.0000	SUSC	> 64.0000	RESIST	> 256.0000	RESIST	> 32.0000	RESIST	= 0.2500	SUSC
	18-024125-086	Cattle, Domestic	Salmonella enterica subsp. enterica serovar Dublin	2016	UNKNOWN	UNKNOWN	USA	SD	SAMN19641943	<= 1.0000	SUSC	= 2.0000	SUSC	= 4.0000	SUSC	= 8.0000	SUSC	<= 0.2500	SUSC	> 32.0000	RESIST	= 0.0300	SUSC	= 0.5000	SUSC	<= 0.0600	SUSC	= 4.0000	SUSC	> 64.0000	RESIST	> 256.0000	RESIST	> 32.0000	RESIST	= 0.5000	SUSC
	18-024125-089	Cattle, Domestic	Salmonella enterica subsp. enterica serovar Dublin	2016	INFECTION	INTEST	USA	IL	SAMN19642024	> 32.0000	RESIST	> 32.0000	RESIST	= 4.0000	SUSC	= 32.0000	RESIST	= 16.0000	RESIST	> 32.0000	RESIST	= 0.2500	INTER	= 0.5000	SUSC	<= 0.0600	SUSC	> 32.0000	RESIST	> 64.0000	RESIST	> 256.0000	RESIST	> 32.0000	RESIST	= 0.2500	SUSC
	18-024127-065	Cattle, Domestic	Salmonella enterica subsp. enterica serovar Dublin	2016	INFECTION	LNMES	USA	NY	SAMN19642054	> 32.0000	RESIST	> 32.0000	RESIST	= 4.0000	SUSC	> 32.0000	RESIST	= 32.0000	RESIST	> 32.0000	RESIST	= 0.0300	SUSC	= 1.0000	SUSC	<= 0.0600	SUSC	= 4.0000	SUSC	> 64.0000	RESIST	> 256.0000	RESIST	> 32.0000	RESIST	= 0.2500	SUSC
	18-024127-066	Cattle, Domestic	Salmonella enterica subsp. enterica serovar Dublin	2016	INFECTION	MILK	USA	NY	SAMN19642055	> 32.0000	RESIST	> 32.0000	RESIST	= 4.0000	SUSC	> 32.0000	RESIST	= 32.0000	RESIST	> 32.0000	RESIST	= 0.0300	SUSC	= 1.0000	SUSC	<= 0.0600	SUSC	= 4.0000	SUSC	> 64.0000	RESIST	> 256.0000	RESIST	> 32.0000	RESIST	= 0.2500	SUSC
	18-024127-077	Cattle, Domestic	Salmonella enterica subsp. enterica serovar Dublin	2016	INFECTION	BRAIN	USA	WI	SAMN19641992	> 32.0000	RESIST	> 32.0000	RESIST	= 4.0000	SUSC	> 32.0000	RESIST	> 64.0000	RESIST	> 32.0000	RESIST	= 0.0300	SUSC	= 1.0000	SUSC	<= 0.0600	SUSC	= 4.0000	SUSC	= 32.0000	RESIST	> 256.0000	RESIST	> 32.0000	RESIST	= 0.2500	SUSC
	18-024128-001	Cattle, Domestic	Salmonella enterica subsp. enterica serovar Dublin	2016	UNKNOWN	LIVER	USA	SD	SAMN19641944	> 32.0000	RESIST	> 32.0000	RESIST	= 2.0000	SUSC	= 16.0000	INTER	= 8.0000	RESIST	> 32.0000	RESIST	= 0.1200	INTER	= 0.5000	SUSC	<= 0.0600	SUSC	> 32.0000	RESIST	> 64.0000	RESIST	> 256.0000	RESIST	= 32.0000	RESIST	<= 0.1200	SUSC
	18-024128-026	Cattle, Domestic	Salmonella enterica subsp. enterica serovar Dublin	2016	INFECTION	LUNG	USA	IN	SAMN19642029	> 32.0000	RESIST	> 32.0000	RESIST	= 4.0000	SUSC	> 32.0000	RESIST	= 32.0000	RESIST	> 32.0000	RESIST	= 0.0300	SUSC	= 1.0000	SUSC	<= 0.0600	SUSC	= 4.0000	SUSC	> 64.0000	RESIST	> 256.0000	RESIST	> 32.0000	RESIST	= 0.2500	SUSC
	18-024128-028	Cattle, Domestic	Salmonella enterica subsp. enterica serovar Dublin	2016	INFECTION	LUNG	USA	IA	SAMN19642008	> 32.0000	RESIST	> 32.0000	RESIST	= 4.0000	SUSC	= 32.0000	RESIST	= 16.0000	RESIST	> 32.0000	RESIST	<= 0.0150	SUSC	= 0.5000	SUSC	<= 0.0600	SUSC	= 4.0000	SUSC	> 64.0000	RESIST	> 256.0000	RESIST	> 32.0000	RESIST	<= 0.1200	SUSC
	18-024128-037	Cattle, Domestic	Salmonella enterica subsp. enterica serovar Dublin	2016	UNKNOWN	FECES	USA	MI	SAMN19641991	> 32.0000	RESIST	> 32.0000	RESIST	= 4.0000	SUSC	> 32.0000	RESIST	= 32.0000	RESIST	> 32.0000	RESIST	= 0.0300	SUSC	= 1.0000	SUSC	<= 0.0600	SUSC	= 4.0000	SUSC	> 64.0000	RESIST	> 256.0000	RESIST	> 32.0000	RESIST	= 0.2500	SUSC
	18-024128-056	Cattle, Domestic	Salmonella enterica subsp. enterica serovar Dublin	2016	INFECTION	LIVER	USA	MN	SAMN19641972	> 32.0000	RESIST	> 32.0000	RESIST	= 4.0000	SUSC	= 32.0000	RESIST	= 8.0000	RESIST	> 32.0000	RESIST	= 0.2500	INTER	= 1.0000	SUSC	<= 0.0600	SUSC	> 32.0000	RESIST	> 64.0000	RESIST	> 256.0000	RESIST	> 32.0000	RESIST	= 0.2500	SUSC
	18-024128-062	Cattle, Domestic	Salmonella enterica subsp. enterica serovar Dublin	2016	INFECTION	LUNG	USA	IA	SAMN19642009	> 32.0000	RESIST	> 32.0000	RESIST	= 4.0000	SUSC	> 32.0000	RESIST	= 32.0000	RESIST	> 32.0000	RESIST	= 0.0300	SUSC	= 1.0000	SUSC	<= 0.0600	SUSC	= 2.0000	SUSC	> 64.0000	RESIST	> 256.0000	RESIST	> 32.0000	RESIST	= 0.2500	SUSC
	18-024128-072	Cattle, Domestic	Salmonella enterica subsp. enterica serovar Dublin	2016	INFECTION	LUNG, LIVER, INTEST	USA	TX	SAMN19641950	> 32.0000	RESIST	> 32.0000	RESIST	= 8.0000	SUSC	> 32.0000	RESIST	= 16.0000	RESIST	> 32.0000	RESIST	= 0.0300	SUSC	= 1.0000	SUSC	<= 0.0600	SUSC	= 4.0000	SUSC	> 64.0000	RESIST	> 256.0000	RESIST	> 32.0000	RESIST	= 0.5000	SUSC
	18-024128-094	Cattle, Domestic	Salmonella enterica subsp. enterica serovar Dublin	2016	UNKNOWN	LUNG	USA	IL	SAMN19642025	> 32.0000	RESIST	> 32.0000	RESIST	= 4.0000	SUSC	> 32.0000	RESIST	= 64.0000	RESIST	> 32.0000	RESIST	= 0.2500	INTER	= 1.0000	SUSC	<= 0.0600	SUSC	> 32.0000	RESIST	> 64.0000	RESIST	> 256.0000	RESIST	> 32.0000	RESIST	= 0.2500	SUSC
	18-024128-098	Cattle, Domestic	Salmonella enterica subsp. enterica serovar Dublin	2016	UNKNOWN	LUNG	USA	MN	SAMN19641973	> 32.0000	RESIST	> 32.0000	RESIST	= 8.0000	SUSC	> 32.0000	RESIST	= 16.0000	RESIST	> 32.0000	RESIST	= 0.0300	SUSC	= 1.0000	SUSC	<= 0.0600	SUSC	= 4.0000	SUSC	> 64.0000	RESIST	> 256.0000	RESIST	> 32.0000	RESIST	= 0.2500	SUSC
	18-024131-039	Cattle, Domestic	Salmonella enterica subsp. enterica serovar Dublin	2016	INFECTION	LUNG	USA	NY	SAMN19642056	> 32.0000	RESIST	> 32.0000	RESIST	= 2.0000	SUSC	> 32.0000	RESIST	= 32.0000	RESIST	> 32.0000	RESIST	= 0.0300	SUSC	= 1.0000	SUSC	<= 0.0600	SUSC	= 4.0000	SUSC	> 64.0000	RESIST	> 256.0000	RESIST	> 32.0000	RESIST	<= 0.1200	SUSC
	18-024131-042	Cattle, Domestic	Salmonella enterica subsp. enterica serovar Dublin	2016	INFECTION	FECES	USA	WA	SAMN19641930	<= 1.0000	SUSC	<= 1.0000	SUSC	= 1.0000	SUSC	= 4.0000	SUSC	<= 0.2500	SUSC	> 32.0000	RESIST	<= 0.0150	SUSC	<= 0.2500	SUSC	<= 0.0600	SUSC	= 1.0000	SUSC	> 64.0000	RESIST	> 256.0000	RESIST	> 32.0000	RESIST	<= 0.1200	SUSC
	18-024131-046	Cattle, Domestic	Salmonella enterica subsp. enterica serovar Dublin	2016	INFECTION	LIVER	USA	MN	SAMN19641974	> 32.0000	RESIST	> 32.0000	RESIST	= 4.0000	SUSC	> 32.0000	RESIST	= 16.0000	RESIST	> 32.0000	RESIST	= 0.0300	SUSC	= 1.0000	SUSC	<= 0.0600	SUSC	= 4.0000	SUSC	> 64.0000	RESIST	> 256.0000	RESIST	> 32.0000	RESIST	= 0.2500	SUSC
	18-024131-048	Cattle, Domestic	Salmonella enterica subsp. enterica serovar Dublin	2016	INFECTION	INTEST	USA	KY	SAMN19642064	> 32.0000	RESIST	> 32.0000	RESIST	= 4.0000	SUSC	> 32.0000	RESIST	= 16.0000	RESIST	> 32.0000	RESIST	= 0.0300	SUSC	= 0.5000	SUSC	<= 0.0600	SUSC	= 4.0000	SUSC	> 64.0000	RESIST	> 256.0000	RESIST	> 32.0000	RESIST	= 0.2500	SUSC
	18-024131-058	Cattle, Domestic	Salmonella enterica subsp. enterica serovar Dublin	2016	INFECTION	LUNG	USA	OH	SAMN19642034	= 2.0000	SUSC	= 2.0000	SUSC	= 8.0000	SUSC	= 8.0000	SUSC	<= 0.2500	SUSC	> 32.0000	RESIST	= 0.0300	SUSC	= 1.0000	SUSC	<= 0.0600	SUSC	= 4.0000	SUSC	> 64.0000	RESIST	> 256.0000	RESIST	> 32.0000	RESIST	= 0.5000	SUSC
	18-024131-084	Cattle, Domestic	Salmonella enterica subsp. enterica serovar Dublin	2016	INFECTION	LIVER	USA	MN	SAMN19641975	> 32.0000	RESIST	> 32.0000	RESIST	= 4.0000	SUSC	> 32.0000	RESIST	= 64.0000	RESIST	> 32.0000	RESIST	= 0.2500	INTER	= 1.0000	SUSC	<= 0.0600	SUSC	> 32.0000	RESIST	> 64.0000	RESIST	> 256.0000	RESIST	> 32.0000	RESIST	= 0.2500	SUSC
	18-038310-001	Cattle, Domestic	Salmonella enterica subsp. enterica serovar Dublin	2016	UNKNOWN	FSWAB	USA	PA	SAMN19642042	> 32.0000	RESIST	> 32.0000	RESIST	= 8.0000	SUSC	> 32.0000	RESIST	= 32.0000	RESIST	> 32.0000	RESIST	<= 0.0150	SUSC	= 1.0000	SUSC	<= 0.0600	SUSC	= 2.0000	SUSC	> 64.0000	RESIST	> 256.0000	RESIST	> 32.0000	RESIST	= 0.2500	SUSC
	18-038310-009	Cattle, Domestic	Salmonella enterica subsp. enterica serovar Dublin	2016	INFECTION	LUNG	USA	IA	SAMN19642010	> 32.0000	RESIST	> 32.0000	RESIST	= 8.0000	SUSC	> 32.0000	RESIST	= 16.0000	RESIST	> 32.0000	RESIST	= 0.5000	INTER	= 1.0000	SUSC	<= 0.0600	SUSC	> 32.0000	RESIST	> 64.0000	RESIST	> 256.0000	RESIST	> 32.0000	RESIST	= 0.2500	SUSC
	18-038310-038	Cattle, Domestic	Salmonella enterica subsp. enterica serovar Dublin	2016	INFECTION	LIVER	USA	MN	SAMN19641976	> 32.0000	RESIST	> 32.0000	RESIST	= 4.0000	SUSC	> 32.0000	RESIST	= 16.0000	RESIST	> 32.0000	RESIST	= 0.0300	SUSC	= 0.5000	SUSC	<= 0.0600	SUSC	= 4.0000	SUSC	> 64.0000	RESIST	> 256.0000	RESIST	> 32.0000	RESIST	<= 0.1200	SUSC
	18-038310-064	Cattle, Domestic	Salmonella enterica subsp. enterica serovar Dublin	2016	UNKNOWN	LIVER	USA	MN	SAMN19641977	= 32.0000	RESIST	> 32.0000	RESIST	= 4.0000	SUSC	= 16.0000	INTER	= 8.0000	RESIST	> 32.0000	RESIST	= 0.2500	INTER	= 0.5000	SUSC	<= 0.0600	SUSC	> 32.0000	RESIST	> 64.0000	RESIST	> 256.0000	RESIST	= 32.0000	RESIST	<= 0.1200	SUSC
	18-038310-069	Cattle, Domestic	Salmonella enterica subsp. enterica serovar Dublin	2016	UNKNOWN	UNKNOWN	USA	OH	SAMN19642035	> 32.0000	RESIST	> 32.0000	RESIST	= 8.0000	SUSC	> 32.0000	RESIST	= 16.0000	RESIST	> 32.0000	RESIST	= 0.0300	SUSC	= 1.0000	SUSC	<= 0.0600	SUSC	= 8.0000	SUSC	> 64.0000	RESIST	> 256.0000	RESIST	> 32.0000	RESIST	= 0.2500	SUSC
	18-038310-074	Cattle, Domestic	Salmonella enterica subsp. enterica serovar Dublin	2016	INFECTION	KIDNEY	USA	NY	SAMN19642057	> 32.0000	RESIST	> 32.0000	RESIST	= 4.0000	SUSC	> 32.0000	RESIST	= 32.0000	RESIST	> 32.0000	RESIST	= 0.0300	SUSC	= 0.5000	SUSC	<= 0.0600	SUSC	= 4.0000	SUSC	> 64.0000	RESIST	> 256.0000	RESIST	> 32.0000	RESIST	= 0.2500	SUSC
	18-038310-079	Cattle, Domestic	Salmonella enterica subsp. enterica serovar Dublin	2016	INFECTION	LIVER	USA	MN	SAMN19641978	<= 1.0000	SUSC	= 2.0000	SUSC	= 4.0000	SUSC	= 2.0000	SUSC	<= 0.2500	SUSC	> 32.0000	RESIST	<= 0.0150	SUSC	= 0.5000	SUSC	<= 0.0600	SUSC	= 4.0000	SUSC	> 64.0000	RESIST	> 256.0000	RESIST	> 32.0000	RESIST	= 0.2500	SUSC
	18-038873-014	Cattle, Domestic	Salmonella enterica subsp. enterica serovar Dublin	2016	INFECTION	LUNG	USA	MO	SAMN19642019	> 32.0000	RESIST	> 32.0000	RESIST	= 4.0000	SUSC	> 32.0000	RESIST	= 32.0000	RESIST	> 32.0000	RESIST	= 0.0300	SUSC	= 1.0000	SUSC	<= 0.0600	SUSC	= 4.0000	SUSC	> 64.0000	RESIST	> 256.0000	RESIST	> 32.0000	RESIST	= 0.2500	SUSC
	18-038873-031	Cattle, Domestic	Salmonella enterica subsp. enterica serovar Dublin	2016	INFECTION	LYMPH	USA	WA	SAMN19641931	> 32.0000	RESIST	> 32.0000	RESIST	= 2.0000	SUSC	> 32.0000	RESIST	= 32.0000	RESIST	= 32.0000	RESIST	= 0.0300	SUSC	> 16.0000	RESIST	<= 0.0600	SUSC	= 4.0000	SUSC	= 64.0000	RESIST	> 256.0000	RESIST	> 32.0000	RESIST	<= 0.1200	SUSC
	18-038873-042	Cattle, Domestic	Salmonella enterica subsp. enterica serovar Dublin	2016	INFECTION	LUNG	USA	ID	SAMN19641934	> 32.0000	RESIST	> 32.0000	RESIST	= 4.0000	SUSC	> 32.0000	RESIST	= 64.0000	RESIST	> 32.0000	RESIST	= 0.0300	SUSC	> 16.0000	RESIST	<= 0.0600	SUSC	= 4.0000	SUSC	= 16.0000	SUSC	> 256.0000	RESIST	> 32.0000	RESIST	= 0.2500	SUSC
	18-038873-049	Cattle, Domestic	Salmonella enterica subsp. enterica serovar Dublin	2016	INFECTION	LUNG	USA	PA	SAMN19642043	> 32.0000	RESIST	> 32.0000	RESIST	= 2.0000	SUSC	> 32.0000	RESIST	= 64.0000	RESIST	> 32.0000	RESIST	<= 0.0150	SUSC	= 1.0000	SUSC	<= 0.0600	SUSC	= 4.0000	SUSC	> 64.0000	RESIST	> 256.0000	RESIST	> 32.0000	RESIST	= 0.2500	SUSC
	18-038873-051	Cattle, Domestic	Salmonella enterica subsp. enterica serovar Dublin	2016	INFECTION	LUNG	USA	MN	SAMN19641979	= 2.0000	SUSC	= 2.0000	SUSC	= 4.0000	SUSC	= 8.0000	SUSC	<= 0.2500	SUSC	> 32.0000	RESIST	= 0.0300	SUSC	= 0.5000	SUSC	= 0.1200	SUSC	= 4.0000	SUSC	> 64.0000	RESIST	> 256.0000	RESIST	> 32.0000	RESIST	= 0.2500	SUSC
	18-038873-066	Cattle, Domestic	Salmonella enterica subsp. enterica serovar Dublin	2016	INFECTION	INTEST	USA	NY	SAMN19642058	> 32.0000	RESIST	> 32.0000	RESIST	= 4.0000	SUSC	> 32.0000	RESIST	= 16.0000	RESIST	> 32.0000	RESIST	= 0.0300	SUSC	= 1.0000	SUSC	<= 0.0600	SUSC	= 4.0000	SUSC	> 64.0000	RESIST	> 256.0000	RESIST	> 32.0000	RESIST	= 0.2500	SUSC
	18-038873-069	Cattle, Domestic	Salmonella enterica subsp. enterica serovar Dublin	2016	INFECTION	LUNG	USA	IA	SAMN19642011	> 32.0000	RESIST	> 32.0000	RESIST	= 4.0000	SUSC	> 32.0000	RESIST	= 32.0000	RESIST	> 32.0000	RESIST	= 0.0300	SUSC	= 1.0000	SUSC	<= 0.0600	SUSC	= 4.0000	SUSC	> 64.0000	RESIST	> 256.0000	RESIST	> 32.0000	RESIST	= 0.5000	SUSC
	18-038874-001	Cattle, Domestic	Salmonella enterica subsp. enterica serovar Dublin	2016	INFECTION	LNMES	USA	WA	SAMN19641932	= 8.0000	SUSC	> 32.0000	RESIST	= 4.0000	SUSC	= 8.0000	SUSC	<= 0.2500	SUSC	= 8.0000	SUSC	= 0.0300	SUSC	= 0.5000	SUSC	<= 0.0600	SUSC	= 4.0000	SUSC	= 32.0000	RESIST	<= 16.0000	SUSC	<= 4.0000	SUSC	<= 0.1200	SUSC
	18-038874-053	Cattle, Domestic	Salmonella enterica subsp. enterica serovar Dublin	2017	INFECTION	LUNG	USA	IA	SAMN19642012	> 32.0000	RESIST	> 32.0000	RESIST	= 4.0000	SUSC	= 16.0000	INTER	= 4.0000	RESIST	> 32.0000	RESIST	= 0.2500	INTER	= 1.0000	SUSC	<= 0.0600	SUSC	> 32.0000	RESIST	> 64.0000	RESIST	> 256.0000	RESIST	> 32.0000	RESIST	<= 0.1200	SUSC
	18-038875-038	Cattle, Domestic	Salmonella enterica subsp. enterica serovar Dublin	2017	INFECTION	LUNG	USA	IN	SAMN19642030	> 32.0000	RESIST	> 32.0000	RESIST	= 4.0000	SUSC	> 32.0000	RESIST	= 32.0000	RESIST	> 32.0000	RESIST	= 0.0300	SUSC	= 1.0000	SUSC	<= 0.0600	SUSC	= 4.0000	SUSC	> 64.0000	RESIST	> 256.0000	RESIST	> 32.0000	RESIST	= 0.2500	SUSC
	18-038875-044	Cattle, Domestic	Salmonella enterica subsp. enterica serovar Dublin	2017	INFECTION	LUNG	USA	TX	SAMN19641951	> 32.0000	RESIST	> 32.0000	RESIST	= 4.0000	SUSC	> 32.0000	RESIST	= 32.0000	RESIST	> 32.0000	RESIST	= 0.0600	SUSC	= 0.5000	SUSC	<= 0.0600	SUSC	= 4.0000	SUSC	> 64.0000	RESIST	> 256.0000	RESIST	> 32.0000	RESIST	= 0.2500	SUSC
	18-038875-069	Cattle, Domestic	Salmonella enterica subsp. enterica serovar Dublin	2017	INFECTION	LIVER	USA	MN	SAMN19641980	<= 1.0000	SUSC	= 2.0000	SUSC	= 8.0000	SUSC	= 8.0000	SUSC	<= 0.2500	SUSC	> 32.0000	RESIST	= 0.0300	SUSC	<= 0.2500	SUSC	<= 0.0600	SUSC	= 2.0000	SUSC	> 64.0000	RESIST	> 256.0000	RESIST	> 32.0000	RESIST	<= 0.1200	SUSC
	18-038876-001	Cattle, Domestic	Salmonella enterica subsp. enterica serovar Dublin	2017	UNKNOWN	UNKNOWN	USA	FL	SAMN19642067	> 32.0000	RESIST	> 32.0000	RESIST	= 4.0000	SUSC	> 32.0000	RESIST	= 64.0000	RESIST	> 32.0000	RESIST	= 0.0300	SUSC	= 1.0000	SUSC	<= 0.0600	SUSC	= 4.0000	SUSC	> 64.0000	RESIST	> 256.0000	RESIST	> 32.0000	RESIST	= 4.0000	RESIST
	18-038876-038	Cattle, Domestic	Salmonella enterica subsp. enterica serovar Dublin	2017	INFECTION	LUNG	USA	OH	SAMN19642036	> 32.0000	RESIST	> 32.0000	RESIST	= 4.0000	SUSC	= 32.0000	RESIST	= 16.0000	RESIST	> 32.0000	RESIST	<= 0.0150	SUSC	= 1.0000	SUSC	<= 0.0600	SUSC	= 4.0000	SUSC	> 64.0000	RESIST	> 256.0000	RESIST	> 32.0000	RESIST	= 0.2500	SUSC
	18-038876-077	Cattle, Domestic	Salmonella enterica subsp. enterica serovar Dublin	2017	INFECTION	LUNG	USA	IA	SAMN19642013	> 32.0000	RESIST	> 32.0000	RESIST	= 4.0000	SUSC	> 32.0000	RESIST	= 64.0000	RESIST	= 8.0000	SUSC	= 0.2500	INTER	= 2.0000	SUSC	<= 0.0600	SUSC	> 32.0000	RESIST	> 64.0000	RESIST	> 256.0000	RESIST	> 32.0000	RESIST	= 0.2500	SUSC
	18-038877-005	Cattle, Domestic	Salmonella enterica subsp. enterica serovar Dublin	2017	INFECTION	LIVER	USA	MN	SAMN19641981	<= 1.0000	SUSC	<= 1.0000	SUSC	= 4.0000	SUSC	= 4.0000	SUSC	<= 0.2500	SUSC	> 32.0000	RESIST	= 1.0000	RESIST	= 0.5000	SUSC	<= 0.0600	SUSC	> 32.0000	RESIST	> 64.0000	RESIST	> 256.0000	RESIST	> 32.0000	RESIST	= 0.5000	SUSC
	18-038877-012	Cattle, Domestic	Salmonella enterica subsp. enterica serovar Dublin	2017	INFECTION	LIVER	USA	MN	SAMN19641982	> 32.0000	RESIST	> 32.0000	RESIST	= 4.0000	SUSC	> 32.0000	RESIST	= 16.0000	RESIST	> 32.0000	RESIST	= 0.0300	SUSC	= 1.0000	SUSC	<= 0.0600	SUSC	= 4.0000	SUSC	> 64.0000	RESIST	> 256.0000	RESIST	> 32.0000	RESIST	= 0.2500	SUSC
	18-038877-073	Cattle, Domestic	Salmonella enterica subsp. enterica serovar Dublin	2017	INFECTION	LUNG	USA	IA	SAMN19642014	<= 1.0000	SUSC	<= 1.0000	SUSC	= 4.0000	SUSC	= 2.0000	SUSC	<= 0.2500	SUSC	> 32.0000	RESIST	<= 0.0150	SUSC	= 2.0000	SUSC	<= 0.0600	SUSC	= 4.0000	SUSC	> 64.0000	RESIST	> 256.0000	RESIST	> 32.0000	RESIST	<= 0.1200	SUSC
	18-038877-077	Cattle, Domestic	Salmonella enterica subsp. enterica serovar Dublin	2017	INFECTION	LIVER	USA	MN	SAMN19641983	> 32.0000	RESIST	> 32.0000	RESIST	= 4.0000	SUSC	> 32.0000	RESIST	= 32.0000	RESIST	> 32.0000	RESIST	= 0.0300	SUSC	= 1.0000	SUSC	<= 0.0600	SUSC	= 4.0000	SUSC	> 64.0000	RESIST	> 256.0000	RESIST	> 32.0000	RESIST	<= 0.1200	SUSC
	18-038877-079	Cattle, Domestic	Salmonella enterica subsp. enterica serovar Dublin	2017	INFECTION	LUNG	USA	MD	SAMN19642061	> 32.0000	RESIST	> 32.0000	RESIST	= 4.0000	SUSC	> 32.0000	RESIST	= 32.0000	RESIST	> 32.0000	RESIST	= 0.0300	SUSC	= 1.0000	SUSC	<= 0.0600	SUSC	= 8.0000	SUSC	> 64.0000	RESIST	> 256.0000	RESIST	> 32.0000	RESIST	= 0.2500	SUSC
	19-020610-006	Cattle, Domestic	Salmonella enterica subsp. enterica serovar Dublin	2017	INFECTION	LIVER	USA	MN	SAMN19641984	> 32	RESIST	> 32	RESIST	= 8	SUSC	> 32	RESIST	= 64	RESIST	> 32	RESIST	= 0.03	SUSC	= 1	SUSC	<= 0.06	SUSC	= 4	SUSC	> 64	RESIST	> 256	RESIST	> 32	RESIST	= 0.25	SUSC
	19-020610-013	Cattle, Domestic	Salmonella enterica subsp. enterica serovar Dublin	2017	INFECTION	LIVER	USA	MN	SAMN19641985	> 32	RESIST	> 32	RESIST	= 4	SUSC	> 32	RESIST	= 32	RESIST	> 32	RESIST	= 0.5	INTER	= 2	SUSC	<= 0.06	SUSC	> 32	RESIST	> 64	RESIST	> 256	RESIST	> 32	RESIST	<= 0.12	SUSC
	19-020610-035	Cattle, Domestic	Salmonella enterica subsp. enterica serovar Dublin	2017	UNKNOWN	LUNG	USA	SD	SAMN19641945	> 32	RESIST	> 32	RESIST	= 4	SUSC	> 32	RESIST	= 16	RESIST	> 32	RESIST	= 0.25	INTER	= 0.5	SUSC	<= 0.06	SUSC	> 32	RESIST	> 64	RESIST	> 256	RESIST	> 32	RESIST	= 0.5	SUSC
	19-020610-044	Cattle, Domestic	Salmonella enterica subsp. enterica serovar Dublin	2017	UNKNOWN	INTEST	USA	KY	SAMN19642065	> 32.0000	RESIST	> 32.0000	RESIST	= 4.0000	SUSC	> 32.0000	RESIST	> 64.0000	RESIST	> 32.0000	RESIST	= 0.2500	INTER	= 1.0000	SUSC	<= 0.0600	SUSC	> 32.0000	RESIST	> 64.0000	RESIST	> 256.0000	RESIST	> 32.0000	RESIST	= 0.2500	SUSC
	19-020610-062	Cattle, Domestic	Salmonella enterica subsp. enterica serovar Dublin	2017	INFECTION	MILK	USA	NY	SAMN19642059	> 32	RESIST	> 32	RESIST	= 4	SUSC	> 32	RESIST	= 32	RESIST	> 32	RESIST	= 0.03	SUSC	= 2	SUSC	<= 0.06	SUSC	= 4	SUSC	> 64	RESIST	> 256	RESIST	> 32	RESIST	= 0.25	SUSC
	19-021046-004	Cattle, Domestic	Salmonella enterica subsp. enterica serovar Dublin	2017	INFECTION	LIVER	USA	MN	SAMN19641986	> 32.0000	RESIST	> 32.0000	RESIST	= 4.0000	SUSC	> 32.0000	RESIST	= 16.0000	RESIST	> 32.0000	RESIST	= 0.0300	SUSC	= 2.0000	SUSC	<= 0.0600	SUSC	= 4.0000	SUSC	> 64.0000	RESIST	> 256.0000	RESIST	> 32.0000	RESIST	= 0.5000	SUSC
	19-021046-010	Cattle, Domestic	Salmonella enterica subsp. enterica serovar Dublin	2017	INFECTION	SPLEEN	USA	TX	SAMN19641952	> 32.0000	RESIST	> 32.0000	RESIST	= 8.0000	SUSC	> 32.0000	RESIST	= 32.0000	RESIST	> 32.0000	RESIST	= 0.0300	SUSC	= 2.0000	SUSC	<= 0.0600	SUSC	= 4.0000	SUSC	> 64.0000	RESIST	> 256.0000	RESIST	> 32.0000	RESIST	= 0.5000	SUSC
	19-021046-033	Cattle, Domestic	Salmonella enterica subsp. enterica serovar Dublin	2017	INFECTION	LIVER	USA	MN	SAMN19641987	> 32.0000	RESIST	> 32.0000	RESIST	= 4.0000	SUSC	> 32.0000	RESIST	= 32.0000	RESIST	> 32.0000	RESIST	= 0.5000	INTER	= 2.0000	SUSC	<= 0.0600	SUSC	> 32.0000	RESIST	> 64.0000	RESIST	> 256.0000	RESIST	> 32.0000	RESIST	= 4.0000	RESIST
	19-021046-055	Cattle, Domestic	Salmonella enterica subsp. enterica serovar Dublin	2017	INFECTION	LIVER	USA	MN	SAMN19641988	> 32.0000	RESIST	> 32.0000	RESIST	= 4.0000	SUSC	> 32.0000	RESIST	= 64.0000	RESIST	> 32.0000	RESIST	= 0.0300	SUSC	= 1.0000	SUSC	<= 0.0600	SUSC	= 4.0000	SUSC	> 64.0000	RESIST	> 256.0000	RESIST	> 32.0000	RESIST	= 0.2500	SUSC
	19-021046-064	Cattle, Domestic	Salmonella enterica subsp. enterica serovar Dublin	2017	UNKNOWN	UNKNOWN	USA	TX	SAMN19641953	= 2.0000	SUSC	= 2.0000	SUSC	= 8.0000	SUSC	= 8.0000	SUSC	<= 0.2500	SUSC	> 32.0000	RESIST	= 0.5000	INTER	= 0.5000	SUSC	<= 0.0600	SUSC	> 32.0000	RESIST	> 64.0000	RESIST	> 256.0000	RESIST	> 32.0000	RESIST	= 0.5000	SUSC
	19-021046-065	Cattle, Domestic	Salmonella enterica subsp. enterica serovar Dublin	2017	INFECTION	LUNG	USA	OH	SAMN19642037	> 32.0000	RESIST	> 32.0000	RESIST	= 8.0000	SUSC	> 32.0000	RESIST	= 16.0000	RESIST	> 32.0000	RESIST	= 0.0600	SUSC	= 1.0000	SUSC	<= 0.0600	SUSC	= 8.0000	SUSC	> 64.0000	RESIST	> 256.0000	RESIST	> 32.0000	RESIST	= 2.0000	SUSC
	19-021046-067	Cattle, Domestic	Salmonella enterica subsp. enterica serovar Dublin	2017	INFECTION	LUNG	USA	KS	SAMN19641946	> 32.0000	RESIST	> 32.0000	RESIST	= 8.0000	SUSC	> 32.0000	RESIST	= 32.0000	RESIST	> 32.0000	RESIST	= 0.0300	SUSC	= 0.5000	SUSC	<= 0.0600	SUSC	= 4.0000	SUSC	> 64.0000	RESIST	> 256.0000	RESIST	> 32.0000	RESIST	<= 0.1200	SUSC
	19-021046-070	Cattle, Domestic	Salmonella enterica subsp. enterica serovar Dublin	2017	INFECTION	LIVER	USA	WI	SAMN19641993	> 32.0000	RESIST	> 32.0000	RESIST	= 4.0000	SUSC	> 32.0000	RESIST	= 16.0000	RESIST	> 32.0000	RESIST	= 0.0300	SUSC	= 1.0000	SUSC	<= 0.0600	SUSC	= 4.0000	SUSC	> 64.0000	RESIST	> 256.0000	RESIST	> 32.0000	RESIST	<= 0.1200	SUSC
	19-021047-005	Cattle, Domestic	Salmonella enterica subsp. enterica serovar Dublin	2017	UNKNOWN	LUNG	USA	MN	SAMN19641989	> 32.0000	RESIST	> 32.0000	RESIST	= 8.0000	SUSC	> 32.0000	RESIST	= 32.0000	RESIST	> 32.0000	RESIST	= 0.0600	SUSC	= 1.0000	SUSC	<= 0.0600	SUSC	= 4.0000	SUSC	> 64.0000	RESIST	> 256.0000	RESIST	> 32.0000	RESIST	= 4.0000	RESIST
	19-021047-006	Cattle, Domestic	Salmonella enterica subsp. enterica serovar Dublin	2017	UNKNOWN	LIVER	USA	MN	SAMN19641990	> 32.0000	RESIST	> 32.0000	RESIST	= 4.0000	SUSC	= 16.0000	INTER	= 16.0000	RESIST	> 32.0000	RESIST	<= 0.0150	SUSC	= 0.5000	SUSC	<= 0.0600	SUSC	= 4.0000	SUSC	> 64.0000	RESIST	> 256.0000	RESIST	> 32.0000	RESIST	= 0.2500	SUSC
	19-021047-018	Cattle, Domestic	Salmonella enterica subsp. enterica serovar Dublin	2017	INFECTION	LIVER	USA	NY	SAMN19642060	> 32.0000	RESIST	> 32.0000	RESIST	= 4.0000	SUSC	> 32.0000	RESIST	= 64.0000	RESIST	> 32.0000	RESIST	= 0.0300	SUSC	= 1.0000	SUSC	<= 0.0600	SUSC	= 4.0000	SUSC	> 64.0000	RESIST	> 256.0000	RESIST	> 32.0000	RESIST	= 0.2500	SUSC
	19-021047-021	Cattle, Domestic	Salmonella enterica subsp. enterica serovar Dublin	2017	INFECTION	TISSUE	USA	AL	SAMN19642066	> 32.0000	RESIST	> 32.0000	RESIST	= 4.0000	SUSC	= 16.0000	INTER	= 8.0000	RESIST	> 32.0000	RESIST	= 0.2500	INTER	= 1.0000	SUSC	<= 0.0600	SUSC	> 32.0000	RESIST	> 64.0000	RESIST	> 256.0000	RESIST	> 32.0000	RESIST	= 0.2500	SUSC
